# Supplementary material for: A novel protein ubiquitination-related five-gene signature predicts overall survival in patients with lung adenocarcinoma
Source: publisher site journal article supplement (doi:10.18632/aging.202663), 2021-03-10
Supplement: Supplementary file [file aging-v13i6-202663-supplementary-material-SD1.pdf]

SUPPLEMENTARY FIGURES

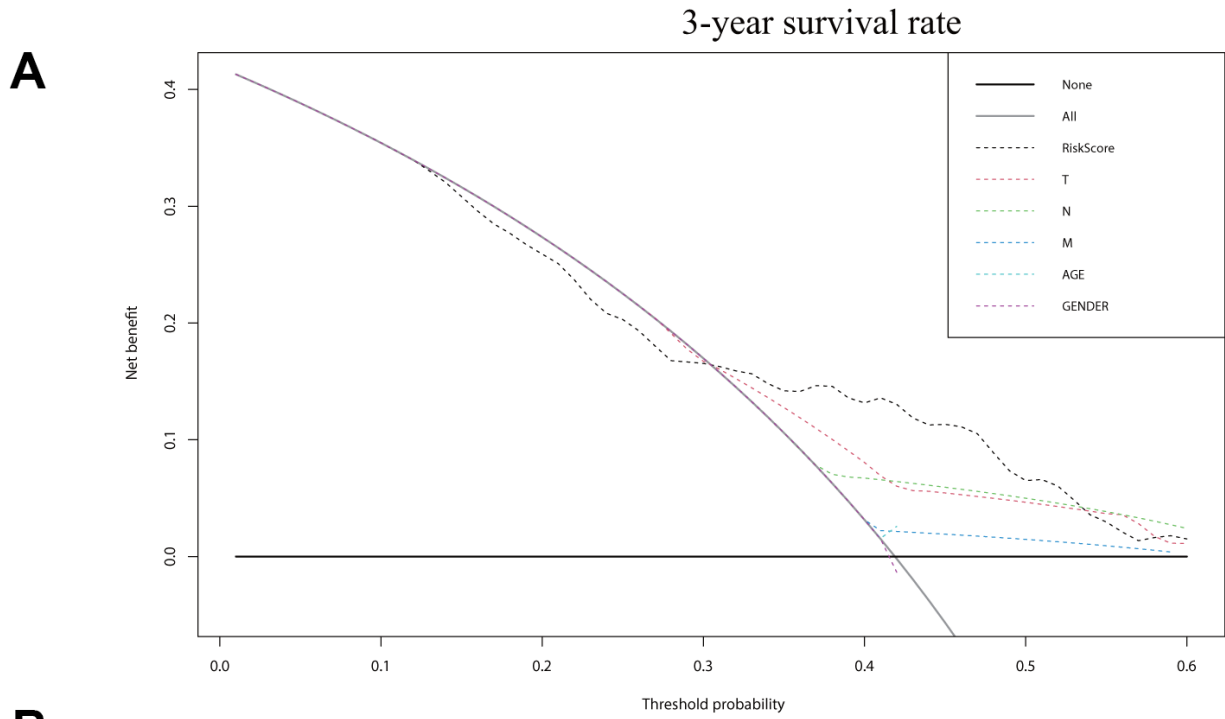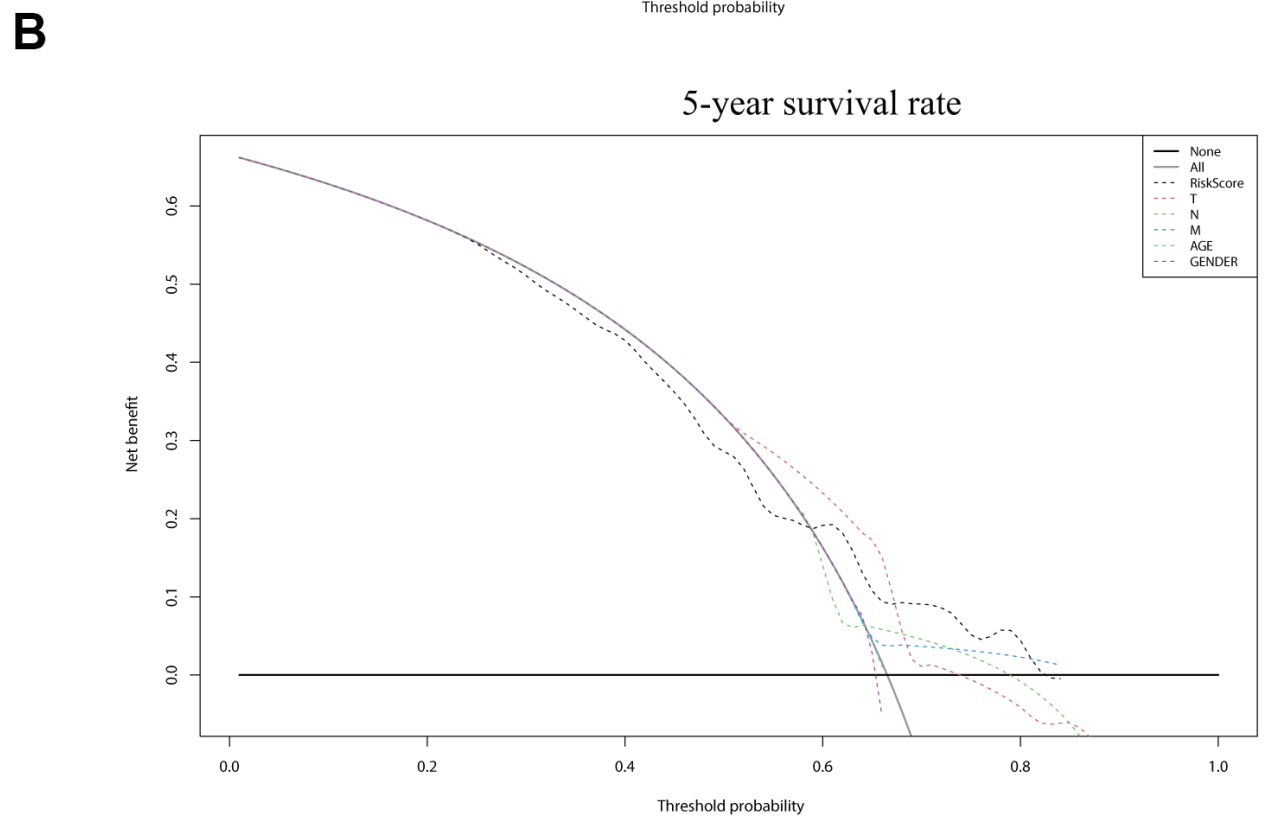

**Supplementary Figure 1. Decision curve analysis of risk scores and other clinical factors. (A)** Decision curve analysis of 3-year survival. **(B)** Decision curve analysis of 5-year survival.
