# Supplementary material for: A novel protein ubiquitination-related five-gene signature predicts overall survival in patients with lung adenocarcinoma
Source: Aging (Albany NY). 2021 Mar 10;13(6):8510–23. doi: 10.18632/aging.202663 (PMC8034934; doi:10.18632/aging.202663)
Supplement: Supplementary Table 1 [file aging-13-202663-s002.xls]

Supplementary Table 1. Table of risk scores, risk grades, and clinical factors for all patients.
id	WDR86	UHRF1	TRIM2	TRIM17	RNF144B	riskScore	risk	futime	fustat	age	gender	stage	T	M	N
TCGA-64-1678	0.8870105	3.227534	9.760979	0.6013778	0.7051046	1.67553561	high	1189	0	70	FEMALE	unknow	T2b	M0	N0
TCGA-44-8117	0.57856072	2.45764932	24.61703891	0.18377887	1.7417578	1.070359271	high	385	0	54	FEMALE	Stage IB	T2a	M0	N0
TCGA-44-2662	5.384953941	5.455046441	45.4633323	2.508657141	9.721924989	0.386774791	low	480	0	65	MALE	Stage IB	T2	M0	N0
TCGA-91-6849	0.6282466	0.33190205	10.41129927	0.17608368	6.64784907	0.914516563	low	35	0	75	FEMALE	Stage IIIA	T2	MX	N2
TCGA-91-A4BD	3.98522221	0.34734362	4.29263363	0.69600441	3.91792617	0.852158531	low	603	0	78	MALE	Stage IIA	T1b	MX	N1
TCGA-62-A46S	0.74444991	0.630443284	5.327624774	1.012751856	5.855030672	1.17694151	high	1653	1	73	MALE	Stage IB	T2	M0	N0
TCGA-44-2666	0.452872023	3.384597203	21.54908015	1.528112443	6.236641603	1.111587534	high	97	1	43	MALE	Stage IB	T2	M0	N0
TCGA-99-8033	0.99979015	6.1488146	3.86733397	8.64101834	5.41208217	4.186411874	high	656	1	74	FEMALE	Stage IV	TX	M1	NX
TCGA-55-7574	2.5610173	2.59623923	13.58686299	1.13460919	6.3716463	0.908054159	low	995	1	64	FEMALE	Stage IB	T2a	M0	N0
TCGA-91-6835	0.78839902	3.6744775	19.69333887	0.52524673	7.7228665	0.939863477	low	79	0	81	FEMALE	Stage IA	T1	M0	N0
TCGA-62-8399	7.768543971	3.694739393	4.19388703	1.195982855	6.761998608	0.628352595	low	2696	0	62	MALE	Stage IIIA	T2	M0	N2
TCGA-MP-A4TI	1.3977847	6.1777501	4.38360121	0.31994408	4.8571441	1.717703738	high	429	1	72	MALE	Stage IIA	T2a	M0	N1
TCGA-55-8510	3.07177357	3.25080379	10.73501881	1.60185553	7.75042487	0.927102849	low	539	0	55	FEMALE	Stage IB	T2a	MX	N0
TCGA-55-8085	0.63812234	2.69184655	6.07152909	2.38426512	5.60919004	1.624343124	high	904	0	64	MALE	Stage IA	T1b	M0	N0
TCGA-55-7995	4.33395954	6.57374523	15.76584591	2.46406892	5.81658288	1.141390881	high	889	0	73	FEMALE	Stage IA	T1b	M0	N0
TCGA-55-6987	3.36755162	2.6365757	7.24879678	0.52851943	6.85647542	0.863050326	low	2137	0	77	MALE	Stage IA	T1	M0	N0
TCGA-78-7154	0.10799056	7.49635069	15.17306299	0.0647828	4.32605384	1.78563961	high	593	1	72	MALE	Stage IIIA	T3	M0	N2
TCGA-49-4494	0.18023999	5.201638532	14.05377146	0.068479004	8.690346872	1.169054268	high	1081	1	77	MALE	Stage IIIA	T3	M0	N2
TCGA-05-4430	1.593894004	2.702139174	15.52953352	1.74547196	4.792236507	1.155544465	high	761	0	59	FEMALE	Stage IB	T2	M0	N0
TCGA-49-AAR3	0.40713736	9.44426662	6.21748619	5.00272817	5.106035	3.908329984	high	1893	0	69	MALE	Stage IIB	T2	MX	N1
TCGA-38-7271	0.11714371	1.50609443	13.21171518	0.06676003	11.16810819	0.768941514	low	800	1	72	FEMALE	Stage IA	T1	M0	N0
TCGA-91-6831	7.230555272	9.320544111	8.918630006	0.531110234	2.982109205	1.114503547	high	310	0	66	MALE	Stage IB	T2	MX	N0
TCGA-55-8616	4.494322703	1.292629044	14.63762176	1.91505982	11.0883536	0.519075197	low	48	0	58	FEMALE	Stage IB	T2a	M0	N0
TCGA-86-7711	4.59088898	2.617553082	0.561867412	2.579017921	5.506705319	1.14447875	high	630	0	70	MALE	Stage IIA	T2a	M0	N1
TCGA-95-7043	0.39472858	2.64064853	11.41382665	0.16996618	3.18742375	1.357223351	high	2	0	63	FEMALE	Stage IA	T1a	MX	N0
TCGA-86-8669	0.63406192	1.34618903	11.45696475	0.52333587	1.89652007	1.323655545	high	938	0	64	MALE	Stage IA	T1b	M0	N0
TCGA-44-A47A	1.54531139	2.56068069	10.66589359	0.80180466	5.98384146	1.080087639	high	466	0	78	FEMALE	Stage IB	T2a	MX	N0
TCGA-55-7816	0.90574257	0.62836038	11.65033031	1.22623366	5.82848331	1.030691152	high	468	1	49	FEMALE	Stage IV	TX	MX	NX
TCGA-44-7671	0.34673931	2.11416267	6.16140339	0.21103577	7.80257212	1.127077986	high	535	0	64	MALE	Stage IB	T2a	M0	N0
TCGA-78-8640	1.42718386	5.7094106	12.47885464	0.4680599	14.93517274	0.785543936	low	6528	0	59	MALE	Stage IIA	T1	M0	N1
TCGA-05-4433	0.394052	2.0405556	14.9249653	0.1585198	5.7963608	1.029572229	high	730	0	82	MALE	Stage IB	T2	M0	N0
TCGA-55-7570	0.27414338	5.0861008	4.23149427	0.24172039	3.65806365	1.925478107	high	824	0	60	MALE	Stage IA	T1a	MX	N0
TCGA-50-5066	2.28632748	3.262435315	13.26825143	0.415426885	8.60563046	0.814789423	low	944	0	72	MALE	Stage IB	T2	M0	N0
TCGA-55-8097	1.00368022	0.72675924	23.99969685	0.56416033	7.55853105	0.664540326	low	476	0	60	FEMALE	Stage IA	T1a	MX	N0
TCGA-91-6840	0.33127791	2.72720461	10.66374231	2.35496667	8.04562104	1.327591357	high	372	0	59	FEMALE	Stage IA	T1b	M0	N0
TCGA-78-8660	0.55630817	5.26747536	13.64169127	0.58984039	9.42244671	1.145549715	high	321	1	69	MALE	Stage IIB	T2	M0	N1
TCGA-44-A47B	1.2249041	2.453167937	67.27180561	0.407673494	3.377003086	0.366843936	low	287	0	79	MALE	Stage IB	T2a	M0	N0
TCGA-44-5645	1.505831137	1.219361563	45.64929112	1.548300187	19.96995232	0.220706328	low	383	0	61	FEMALE	Stage IA	T1	unknow	NX
TCGA-73-7498	7.89281204	0.53634414	8.02669837	2.98917696	4.72293768	0.596578241	low	1189	0	58	FEMALE	Stage IA	T1b	M0	N0
TCGA-L9-A7SV	0.386642682	2.571227665	8.903705975	0.589242801	3.187764084	1.489494472	high	565	0	69	MALE	Stage IIA	T2a	M0	N1
TCGA-44-6147	1.300816063	1.124045077	41.9407816	1.64692359	22.47835703	0.212702249	low	441	0	67	FEMALE	Stage IA	T1b	M0	NX
TCGA-73-4675	3.8067301	1.16653886	12.40542935	0.54410641	2.81215866	0.820472117	low	40	0	59	MALE	Stage IIIA	T3	M0	N1
TCGA-50-5930	0.78723193	1.86716225	5.72104834	0.75560812	5.08334451	1.307250735	high	282	1	47	MALE	Stage IIIA	T2	M0	N2
TCGA-50-5931	0.41846514	6.05320926	8.01313538	9.24643339	22.28826421	1.642060587	high	434	1	75	FEMALE	Stage IB	T2	M0	N0
TCGA-62-A46P	3.225528056	1.480457728	10.27645543	8.193736836	2.698438168	2.111060257	high	594	1	65	MALE	Stage IB	T2	M0	N0
TCGA-50-6595	0.31933359	6.64003969	3.22019199	0.24816511	6.68661818	1.866811883	high	189	1	74	FEMALE	Stage IIIA	T2	M0	N2
TCGA-62-8394	0.65347904	3.86993159	6.5427853	1.80238334	3.91766432	1.833725656	high	139	1	65	FEMALE	Stage IIIB	T4	M0	N2
TCGA-MP-A4TD	2.58897959	2.65107956	4.82209977	3.25921551	2.66159358	1.696123165	high	307	1	71	MALE	Stage IIIA	T2	M0	N2
TCGA-91-6830	0.2140326	1.6682893	5.2166572	2.6936555	12.0633106	1.141382273	high	60	0	65	FEMALE	Stage IIA	T1	MX	N1
TCGA-44-2657	1.9508526	1.3068592	10.0252099	1.507652	8.7947039	0.860282097	low	400	0	74	FEMALE	Stage IB	T2	M0	NX
TCGA-55-8621	1.2361102	1.76902675	8.73142128	0.97693619	11.96055765	0.791171762	low	515	0	75	FEMALE	Stage IA	T1a	MX	N0
TCGA-86-8668	1.587407594	1.533092475	16.14926697	0.288721679	10.64304172	0.636110701	low	423	0	61	FEMALE	Stage IA	T1b	M0	N0
TCGA-05-4425	0.16520443	2.441210936	12.99665961	0.030127924	6.904208228	1.055992732	high	669	0	70	FEMALE	Stage IV	T2	M1	N0
TCGA-MP-A5C7	0.3850833	0.7518124	13.25527	3.35559	3.488119	1.531823644	high	1862	0	76	FEMALE	Stage IB	T2	M0	N0
TCGA-64-1681	0.53635069	1.08183525	6.92419436	0.72370795	11.46754346	0.849836743	low	1167	1	61	FEMALE	Stage IA	T1	M0	N0
TCGA-95-7947	0.185757971	6.941673426	9.749685714	0.336000577	17.92415768	0.891808277	low	40	0	67	MALE	Stage IA	T1a	M0	N0
TCGA-44-6775	1.471941787	6.492058697	30.5779006	1.291235786	20.39862925	0.448094401	low	370	0	72	FEMALE	Stage IB	T2a	MX	N0
TCGA-97-A4M6	1.9221795	0.97404	21.960419	5.8130898	7.3640939	1.103663981	high	568	0	45	FEMALE	Stage IA	T1a	M0	N0
TCGA-38-4632	0.97110041	2.13194957	13.90747024	0.48663558	2.38126828	1.2439186	high	1357	1	42	MALE	Stage IV	T2	M1	N1
TCGA-69-8255	0.1485412	4.389549	1.216123	0.3445542	2.82455	2.090915091	high	129	0	71	MALE	Stage IA	T1a	M0	N0
TCGA-L9-A5IP	0.24410405	4.86678553	1.28755336	11.11311164	5.32279635	5.687903394	high	58	1	40	FEMALE	Stage IV	T3	M1b	N2
TCGA-55-7994	0.265586346	4.32793743	19.04150252	0.37945907	2.616201701	1.418375565	high	603	0	81	MALE	Stage IIB	T3	MX	N0
TCGA-55-7281	0.691227566	2.329708552	17.7094111	2.495937798	7.441234249	1.109629685	high	872	0	70	FEMALE	Stage IA	T1b	M0	N0
TCGA-91-6847	5.75274622	9.09165843	6.4596569	0.12133882	16.21892163	0.618374762	low	842	0	62	FEMALE	Stage IB	T2	MX	N0
TCGA-44-2668	1.355055617	10.26945512	10.47641107	2.184764741	15.22793949	1.411446813	high	246	0	51	MALE	Stage IB	T2	M0	N0
TCGA-69-7764	0.1770577	1.206126	4.51684951	0.43725467	6.5491163	1.218647508	high	414	0	75	MALE	Stage IA	T1b	M0	N0
TCGA-55-8089	0.64666249	4.31312296	1.46984717	0.21058972	8.06224191	1.41650058	high	702	1	56	MALE	Stage IA	T1a	M0	N0
TCGA-MN-A4N4	7.04084508	3.10452053	1.32542662	21.65318326	28.90260684	1.629058703	high	1175	0	57	MALE	Stage IA	T1b	M0	N0
TCGA-55-1596	0.27894467	3.93584327	12.42277521	1.02361274	4.35430563	1.529882297	high	2065	0	55	MALE	Stage IIB	T2	M0	N1
TCGA-83-5908	0.957292	14.10477541	22.04073855	0.40668967	8.78308225	1.905472193	high	824	0	59	FEMALE	Stage IA	T1	M0	N0
TCGA-05-4415	0.2619197	8.331696	1.413063	0.1931699	1.404646	3.026540361	high	91	1	57	MALE	Stage IIIB	T4	M0	N2
TCGA-55-8507	7.6594702	2.918374513	7.863476167	5.93051867	4.110396567	1.052749701	high	418	0	53	MALE	Stage IA	T1a	MX	N0
TCGA-55-6982	1.31697782	4.01385564	32.32119525	0.32676734	4.53666722	0.811627518	low	995	1	79	FEMALE	Stage IIB	T2	M0	N1
TCGA-05-4397	1.13312319	4.60230132	8.55436228	0.49499186	4.86037865	1.452356063	high	731	1	65	MALE	Stage IIB	T2	M0	N1
TCGA-73-4662	0.4767673	2.17350291	27.9944057	0.17510135	4.34664375	0.846547408	low	912	0	65	FEMALE	Stage IA	T1	M0	N0
TCGA-97-8552	6.60732339	0.62199372	13.83253448	1.13661754	8.84345057	0.404169005	low	626	0	55	FEMALE	Stage I	T1a	MX	N0
TCGA-86-8075	1.74088027	3.73232597	7.02960916	0.53659685	16.85690451	0.651867745	low	479	0	66	FEMALE	Stage IB	T2	M0	N0
TCGA-49-4507	0.3499499	5.159428	1.332316	3.039946	2.559449	2.910987905	high	268	1	73	FEMALE	Stage IIIA	T3	M0	N1
TCGA-49-4510	9.735221917	0.299941441	7.695653167	7.148435055	4.689293582	0.724409046	low	896	1	51	FEMALE	Stage IIB	T2	M0	N1
TCGA-MP-A4TA	1.40771113	6.80575592	2.67099547	12.10416071	3.39666058	6.938095454	high	950	1	75	FEMALE	Stage IA	T1	M0	N0
TCGA-55-6970	0.15347836	2.87464098	8.11490921	0.62293635	6.13133933	1.353578685	high	464	1	67	FEMALE	Stage IIIA	T2	MX	N2
TCGA-49-AARN	8.5373959	2.5021991	16.0157745	0.6081812	4.1979829	0.438168551	low	1135	1	56	FEMALE	Stage IA	T1	MX	N0
TCGA-78-7145	0.612964284	4.069517923	16.24274531	0.081396687	3.813402002	1.278538934	high	826	1	52	FEMALE	Stage IV	T4	M1	N1
TCGA-67-3771	0.52729731	1.79392597	8.82882041	3.51636828	14.42196346	0.975629557	low	610	0	77	FEMALE	Stage IA	T1	M0	N0
TCGA-55-5899	0.19570435	3.40062599	22.06892117	0.06373236	3.99810621	1.110313372	high	930	0	58	MALE	unknow	T1a	M0	N1
TCGA-97-8174	1.421918992	0.791111411	10.72893045	4.674604658	6.636443033	1.365235266	high	164	1	67	MALE	Stage IIA	T2b	M0	N0
TCGA-78-7153	0.179743494	2.8962284	9.990937523	0.313708883	2.194694108	1.577414677	high	760	0	65	FEMALE	Stage IB	T2	M0	N0
TCGA-50-6592	1.56446921	3.68143163	5.04112402	1.81630146	3.23995557	1.735278916	high	777	1	71	FEMALE	Stage IB	T2	M0	N0
TCGA-95-7039	7.64281998	3.82002735	22.55313788	0.14295407	7.22822753	0.378723978	low	34	0	54	FEMALE	Stage IIB	T3	MX	N0
TCGA-05-4434	0.520486	3.1890234	5.4104522	3.0819977	7.8628506	1.643806435	high	457	1	67	FEMALE	Stage IV	T4	M1	N1
TCGA-44-6776	0.24375955	0.7663857	14.07073769	0.32124835	9.25046279	0.80232046	low	1938	0	60	FEMALE	Stage IA	T1	MX	N0
TCGA-05-4384	1.89577517	0.75641991	5.38639974	0.62679665	7.68432615	0.890352954	low	426	0	66	MALE	Stage IIIA	T2	M0	N2
TCGA-97-A4M1	0.86874792	0.28312917	7.42989217	0.70038277	8.69714629	0.884654505	low	601	0	52	FEMALE	Stage IA	T1a	M0	N0
TCGA-86-A4D0	0.22281297	7.26595387	7.30375107	0.14765208	2.23922607	2.328863125	high	116	1	48	MALE	Stage IIA	T2b	M0	N0
TCGA-67-3773	0.316377372	0.412276076	2.341296387	0.085406684	7.683737285	1.062421236	high	427	0	84	FEMALE	Stage IB	T2	M0	N0
TCGA-50-6594	7.443187	4.01318402	38.41438362	10.87390296	0.86145982	1.234006348	high	370	1	79	FEMALE	Stage IIIA	T3	M0	N2
TCGA-44-4112	0.554350215	1.810385595	44.47387248	1.95745728	12.71475597	0.423777925	low	370	0	60	FEMALE	Stage IB	T2a	M0	N0
TCGA-55-7724	0.09825	0.7293479	15.34478375	0.17419898	13.34220433	0.616274153	low	705	0	76	FEMALE	Stage IB	T2a	MX	N0
TCGA-49-6767	0.612437435	4.094491403	9.165936274	1.420179627	1.336747998	1.978594741	high	677	0	46	FEMALE	Stage IIB	T3	MX	N0
TCGA-97-7552	0.6383978	1.2074187	19.0888389	0.3297137	9.4630444	0.702856228	low	1932	0	70	MALE	Stage IB	T2	MX	N0
TCGA-91-7771	0.20203417	0.82287292	12.0223862	1.87711426	6.98975416	1.13406537	high	492	0	62	MALE	Stage IIB	T3	MX	N0
TCGA-67-3770	0.17011797	0.23223961	7.87557913	0.48985253	10.77502023	0.825601096	low	610	0	70	FEMALE	Stage IA	T1	M0	N0
TCGA-78-8662	3.529356522	2.803796034	6.329951549	1.214577689	12.12462717	0.693194743	low	3361	1	53	FEMALE	Stage IB	T2	M0	N0
TCGA-55-7914	0.395566918	1.420013114	38.57258821	2.732113456	12.35539193	0.526064704	low	187	1	71	FEMALE	Stage IIA	T1b	MX	N1
TCGA-MP-A4SW	9.40768153	3.41284271	5.36738701	0.83621148	4.97648524	0.521973865	low	1778	1	53	MALE	Stage IIB	T2	M0	N1
TCGA-44-3919	1.48232798	3.780979	18.98354331	0.55771655	7.35504989	0.9054914	low	190	0	71	FEMALE	Stage IA	T1	M0	N0
TCGA-69-8253	0.788400808	0.429014515	15.86319947	0.431204461	4.154693544	0.952738404	low	426	0	59	FEMALE	Stage IIA	T1a	MX	N1
TCGA-55-8096	1.82780674	1.38461361	13.39927971	3.20802436	5.09492395	1.207455719	high	719	1	67	FEMALE	Stage IB	T2a	MX	N0
TCGA-44-3917	8.296320665	4.93285806	12.69402212	2.60736241	4.830482255	0.701916019	low	392	0	33	FEMALE	Stage IB	T2	M0	N0
TCGA-05-4426	0.726817121	2.876263989	4.21569427	0.985152893	4.600782063	1.555733184	high	791	0	71	MALE	Stage IB	T2	M0	N0
TCGA-73-4677	0.93058429	0.24824789	14.41828689	0.75854494	5.35046158	0.91889794	low	38	1	74	MALE	unknow	T2a	M0	N0
TCGA-69-7765	4.74212243	1.44780815	38.61037932	0.40202905	3.52197303	0.402046066	low	165	0	56	MALE	unknow	T4	MX	N0
TCGA-50-7109	4.06774608	2.62400031	9.84823538	0.62179193	7.6178484	0.722389945	low	308	1	60	MALE	Stage IA	T1	M0	N0
TCGA-NJ-A4YP	1.741174969	3.227382704	16.75868805	0.530479602	3.271443602	1.10981967	high	50	0	52	MALE	Stage IB	T2a	M0	N0
TCGA-55-A57B	0.4731436	1.25473677	16.13012021	0.32826207	16.14628567	0.521932007	low	546	0	80	FEMALE	Stage IA	T1b	M0	N0
TCGA-55-8208	1.87006975	2.49163557	8.88962173	0.69663659	7.18207262	0.989515403	high	674	0	73	FEMALE	Stage IA	T1b	M0	N0
TCGA-69-7978	4.46941527	2.71823512	8.59538035	0.26009255	3.97531635	0.845656433	low	134	0	59	MALE	Stage IIB	T2b	MX	N1
TCGA-49-AAQV	2.1922487	3.9979931	14.0712658	4.2272843	4.2564269	1.643226415	high	677	1	63	FEMALE	Stage II	T1	MX	N1
TCGA-44-7670	1.1352233	9.298774	15.8449839	2.0428192	2.7640473	2.413548951	high	531	0	47	FEMALE	Stage IIA	T1b	M0	N1
TCGA-55-7727	1.24834074	1.41259412	31.21409464	0.56423565	4.87757482	0.681294811	low	119	0	70	MALE	Stage IIIA	T1a	MX	N2
TCGA-50-5049	3.0677772	2.6249494	8.6262429	0.1844221	12.1484052	0.617617688	low	2146	0	70	MALE	Stage IA	T2	M0	N0
TCGA-50-5942	0.92391488	0.4274809	15.83446431	0.23899585	8.81752683	0.702116819	low	883	0	67	FEMALE	Stage IA	T1	M0	N0
TCGA-55-7910	11.19850839	3.62706931	11.39878542	2.02463877	1.4333643	0.518778998	low	1040	0	50	FEMALE	Stage IIA	T2b	M0	N0
TCGA-50-5044	0.38589822	5.01853831	1.8241108	0.10996141	1.92587107	2.168327617	high	624	1	72	FEMALE	Stage IIIB	T4	M0	N1
TCGA-55-7573	1.92385613	0.62369333	31.80364869	0.56313295	11.42463949	0.397617955	low	487	0	72	FEMALE	Stage IA	T1b	MX	N0
TCGA-05-5425	0.14547193	3.71859359	5.96348488	2.35015489	5.3083118	1.907958724	high	882	0	68	MALE	Stage IIB	T2b	M0	N1
TCGA-86-8073	0.74717008	1.82131152	18.62721821	1.21814325	11.08378045	0.735550153	low	740	0	58	MALE	Stage IB	T2a	M0	N0
TCGA-05-5423	1.75047634	0.47385237	17.61192341	1.01001208	5.63623695	0.797099593	low	151	0	65	MALE	Stage IIB	T2	M0	N1
TCGA-78-7152	0.11343512	2.52081509	13.7892497	0.55243378	7.98599953	1.043084012	high	1202	0	65	MALE	Stage IB	T2	M0	N0
TCGA-62-A46R	3.88846151	2.1417454	33.62149052	0.59982727	5.34160122	0.483940815	low	1725	1	54	FEMALE	Stage IB	T2	M0	N0
TCGA-86-8280	3.59647695	1.83860283	18.00346627	1.21406474	7.5631194	0.642689745	low	701	0	54	FEMALE	Stage IIA	T2b	M0	N0
TCGA-93-A4JO	1.19753419	3.571284777	9.340073797	2.99083747	10.99579364	1.184780999	high	33	1	70	MALE	Stage IA	T1a	MX	N0
TCGA-49-4490	2.446903	0.7650222	5.8766793	0.8190664	12.6954096	0.629214996	low	385	1	45	FEMALE	Stage IIIA	T3	M0	N2
TCGA-05-5715	0.24238776	1.86576436	32.99655597	0.0952665	9.22902111	0.570923506	low	62	0	69	FEMALE	Stage IB	T2a	M0	N0
TCGA-38-4631	0.29500717	2.3253986	3.58645917	0.22096317	1.60055863	1.746472465	high	354	1	72	FEMALE	Stage IB	T2	M0	N0
TCGA-44-8120	14.35767296	1.59788258	9.46742738	1.16835659	10.22522594	0.170782765	low	260	0	58	MALE	Stage IB	T2a	M0	N0
TCGA-55-7283	0.44958341	2.83551651	58.06832705	0.88286796	8.6307831	0.394162195	low	609	0	76	FEMALE	Stage IIIA	T3	MX	N2
TCGA-53-7624	0.2469451	6.35988193	0.80365037	3.88664431	2.95621389	3.510551219	high	1043	1	40	FEMALE	Stage IV	T2	M1	N0
TCGA-97-7938	0.19521815	0.78308639	34.7482722	0.61381813	9.38990515	0.529290574	low	18	1	76	FEMALE	Stage IA	T1a	MX	N0
TCGA-78-7146	0.16760759	6.45916143	6.7113646	0.2753204	3.10877362	2.142992544	high	173	1	71	FEMALE	Stage IIIA	T2	M0	N2
TCGA-49-4501	0.59932978	0.56353101	22.98744607	0.08618732	8.91607885	0.619934712	low	1421	1	67	FEMALE	Stage IB	T2	M0	N0
TCGA-49-6744	2.65222599	1.46832933	13.23843035	0.5914564	13.03022082	0.531046289	low	890	0	64	FEMALE	Stage IIA	T2a	MX	N1
TCGA-73-4668	2.85387291	2.55787916	12.15045234	0.80248873	3.12893955	1.048852026	high	467	0	66	FEMALE	Stage IIB	T2	M0	N1
TCGA-55-A48Z	3.75019357	2.8998504	6.80423438	1.3869928	3.22883153	1.144494215	high	651	0	60	FEMALE	Stage IIIB	T1a	MX	N3
TCGA-50-5045	1.190163457	1.860518023	5.018961392	0.115987104	5.18616564	1.173813718	high	2174	1	57	FEMALE	unknow	T2	M0	N1
TCGA-55-A491	1.704678299	5.1225615	3.524866345	3.846321854	10.89710099	1.573733402	high	626	0	81	FEMALE	Stage IA	T1b	MX	N0
TCGA-50-5068	0.7229138	0.83879278	22.92614159	0.34332293	4.3915841	0.833690531	low	1499	1	59	FEMALE	Stage IIB	T2	MX	N1
TCGA-73-4666	0.475479789	9.513554451	35.39864988	0.308705964	5.20894171	1.268068189	high	800	0	52	FEMALE	Stage IV	T1	M1	N0
TCGA-55-8087	3.80752033	0.41887727	62.6721853	0.61505976	3.23730161	0.256743703	low	462	0	59	FEMALE	Stage IB	T2a	MX	N0
TCGA-64-1680	6.56668268	0.84521576	33.43287913	0.65368434	4.1399566	0.338237145	low	1126	0	63	MALE	Stage IV	T2a	M1	N2
TCGA-97-A4LX	1.54601673	1.89846016	3.36749864	1.13323151	4.41355224	1.356938207	high	614	0	81	MALE	Stage IB	T2a	M0	N0
TCGA-50-5055	1.09376871	1.71941716	12.54905222	0.26638341	6.07804276	0.963223856	low	1830	1	79	FEMALE	Stage IIA	T1	M0	N1
TCGA-44-6779	0.0740949	2.54067741	4.27001932	0.06333986	9.09775844	1.14899377	high	500	1	50	FEMALE	Stage IIB	T2	MX	N1
TCGA-55-A494	7.33538304	3.361614573	54.28277666	3.445114699	0.630665783	0.39437279	low	481	0	61	FEMALE	Stage IB	T2a	MX	N0
TCGA-50-6590	5.04157728	11.19491198	0.558963708	2.205527744	3.091099066	2.411402638	high	1288	1	72	FEMALE	Stage IB	T2	M0	N0
TCGA-78-7158	0.158882789	1.466480865	12.9033516	0.336317684	9.812095793	0.853637646	low	179	1	59	FEMALE	Stage IIIB	T4	M0	N2
TCGA-MN-A4N5	14.75548376	5.21696235	18.06067878	6.41297125	3.41277108	0.46386443	low	84	0	63	MALE	Stage IA	T1a	M0	N0
TCGA-55-6642	3.05758209	3.44587562	19.62927003	0.18791791	2.6470198	0.902782889	low	2449	0	63	MALE	Stage IB	T2	MX	N0
TCGA-91-A4BC	21.69801726	6.17348601	2.76655924	3.7492332	2.86192741	0.231229656	low	44	0	59	MALE	Stage IIA	T2b	MX	N0
TCGA-67-6217	1.8932592	0.61216679	46.32653677	0.3752924	8.99072282	0.329040437	low	422	0	73	FEMALE	Stage IIA	T2a	M0	N1
TCGA-67-6215	0.57290508	3.06499099	45.61618506	1.755364329	2.890769932	0.788765294	low	174	0	52	FEMALE	Stage IB	T2a	M0	N0
TCGA-86-8358	0.9763836	16.722184	4.679728	0.3709597	3.6342622	4.588871088	high	653	0	44	MALE	Stage IB	T2a	M0	N0
TCGA-86-8671	1.13767	1.93908635	6.90403182	2.2903897	6.4792995	1.328349204	high	839	0	72	FEMALE	Stage IIB	T2b	M0	N1
TCGA-L9-A443	4.41288809	1.07254632	6.9351268	2.10466679	3.16474608	0.979446784	low	193	1	63	FEMALE	Stage IA	T1a	MX	N0
TCGA-86-8055	1.28455716	3.36268817	9.35912835	0.28782131	8.61394466	0.997812327	high	124	1	79	MALE	Stage IIA	T2a	M0	N1
TCGA-95-7562	0.58798666	9.03975182	5.17882915	0.08008506	10.48427543	1.662271254	high	87	1	71	MALE	Stage IIA	T2a	M0	N1
TCGA-71-8520	0.81346134	5.34549199	45.31669474	0.39259009	4.08323393	0.752163605	low	210	1	60	FEMALE	Stage IB	T2	M0	N0
TCGA-05-4398	8.11155066	4.29845509	10.32606269	2.26264029	4.94563014	0.687757602	low	1431	0	47	FEMALE	Stage IIIB	T4	M0	N3
TCGA-J2-A4AG	0.56434118	1.22511317	38.54836124	0.16080861	7.266066	0.520866803	low	500	0	66	FEMALE	Stage IA	T1b	MX	N0
TCGA-05-4405	1.06748624	3.45790472	19.50740308	0.24887407	5.91513958	0.96592968	low	610	0	74	FEMALE	Stage IB	T2	M0	N0
TCGA-67-3772	0.49825559	0.69665273	26.76264436	0.41501135	11.3513845	0.526000389	low	573	0	82	FEMALE	Stage IB	T2	M0	N0
TCGA-35-5375	0.133321496	1.064036495	21.12100213	0.268851335	10.73896473	0.653401904	low	264	0	61	MALE	Stage IIIA	T2	M0	N2
TCGA-44-5644	3.0087418	3.941481	2.58380182	0.13292074	1.0145915	1.491989898	high	498	0	51	FEMALE	Stage IB	T2a	unknow	N0
TCGA-86-A4P8	0.90629354	0.56196658	3.51682936	0.71735467	23.72938591	0.412502618	low	431	0	59	FEMALE	Stage IIIA	T1b	MX	N2
TCGA-O1-A52J	6.352174839	0.894789996	19.52135301	0.669510229	5.130449069	0.445278543	low	1798	1	74	FEMALE	Stage IA	T1	MX	N0
TCGA-78-7536	6.172502023	7.389394393	17.44631148	0.07937374	7.294611969	0.671700981	low	244	1	69	MALE	Stage IIIA	T2	M0	N2
TCGA-55-6981	3.09219995	4.87645519	10.52681403	0.47142732	13.40561874	0.680644865	low	1379	1	53	FEMALE	Stage IIIA	T1	M0	N2
TCGA-78-7156	0.1795146	0.2116493	1.277878	0.9938212	8.181422	1.161518379	high	976	1	62	MALE	Stage IV	T4	M1	N1
TCGA-55-8514	0.90687864	0.81227403	6.16538005	1.6105828	9.7457187	0.977559048	low	520	0	70	FEMALE	Stage IB	T2a	MX	N0
TCGA-55-6712	0.40393801	4.3736919	23.5893292	0.03758428	8.39390122	0.877448891	low	171	1	71	MALE	Stage IIA	T2a	MX	N1
TCGA-NJ-A55R	0.38390328	0.97519276	6.99202963	1.03162632	2.57285577	1.478613002	high	603	0	67	MALE	Stage IA	T1b	MX	N0
TCGA-95-A4VK	0.36052725	2.18417902	29.21496089	10.05825061	6.37585163	2.080309243	high	651	0	74	FEMALE	Stage IIIA	T2b	M0	N2
TCGA-86-8056	0.240359586	1.080326178	36.55011364	0.227657858	11.39671232	0.443847208	low	139	0	63	FEMALE	Stage IIIA	T4	M0	N0
TCGA-55-8090	0.59535923	5.80018931	13.40764415	0.53929944	4.20677653	1.608385936	high	598	1	80	MALE	Stage IA	T1a	M0	N0
TCGA-MP-A4TH	1.3424977	0.65058123	28.26303166	2.54837406	6.5785284	0.751319851	low	446	0	70	FEMALE	Stage IA	T1a	M0	N0
TCGA-44-6145	0.8787856	3.66261353	2.47026275	1.8349321	10.71639382	1.297584104	high	328	0	62	FEMALE	Stage IA	T1	M0	N0
TCGA-55-A48Y	0.47166971	4.10935339	10.44036383	2.96655845	11.93241515	1.24984703	high	630	0	69	MALE	Stage IIA	T2b	M0	N0
TCGA-78-7150	1.26799074	3.77721261	4.49464047	0.62546626	1.60704198	1.782247979	high	666	1	59	MALE	Stage IIB	T2	M0	N1
TCGA-55-8620	0.66163735	7.52413945	2.52224663	0.24068053	2.73369049	2.450728168	high	375	1	60	MALE	Stage IV	T1a	M1b	N1
TCGA-55-7907	2.22184434	1.6501253	14.33478945	0.70789003	4.27912565	0.930987732	low	343	1	77	MALE	Stage IIA	T2a	MX	N1
TCGA-44-3918	7.505259263	1.328495227	45.0582901	3.693944053	9.53160106	0.245052381	low	197	0	60	FEMALE	Stage IA	T1	M0	N0
TCGA-49-AARQ	17.44552496	5.976556073	6.791000212	0.382649702	2.545217569	0.253413712	low	6732	0	41	FEMALE	Stage I	T2	MX	N0
TCGA-64-5775	0.052271925	9.66343611	2.294393063	0.017873816	1.364318456	3.34415543	high	62	1	71	MALE	Stage IIIA	T4	M0	N0
TCGA-MP-A4T6	8.75567982	1.840982455	19.26738859	1.171420493	8.307057108	0.315138168	low	1790	1	76	FEMALE	Stage IIIA	T1	MX	N2
TCGA-05-4403	0.38401724	1.00480876	9.03788259	0.0691108	6.48747178	1.023819895	high	578	0	76	MALE	Stage IB	T2	M0	N0
TCGA-91-8497	3.67101212	0.62648318	15.32872337	0.49791212	6.79147573	0.593000447	low	434	1	75	FEMALE	Stage IA	T1a	MX	N0
TCGA-62-A472	0.45404796	3.82758457	25.7827141	0.2458232	2.77643088	1.124006168	high	910	0	70	MALE	Stage IIB	T3	M0	N0
TCGA-67-4679	0.475557644	0.785919708	4.842402775	0.22932428	7.280022319	1.05728705	high	448	0	69	MALE	unknow	T3	M0	N0
TCGA-44-A479	2.14720196	3.10043171	7.02396212	3.33875052	6.62594492	1.421623068	high	392	0	73	FEMALE	Stage IB	T2	MX	N0
TCGA-78-7167	8.7035557	0.2564476	17.6741676	1.2714684	4.8806813	0.355125591	low	2681	1	77	MALE	Stage IV	T2	M1	N0
TCGA-55-8206	1.07036573	0.64126191	16.19490802	0.39342011	9.09999344	0.696052589	low	888	0	56	MALE	Stage IA	T1b	M0	N0
TCGA-55-8091	1.82671417	1.47075022	17.92296641	0.37311673	4.18139255	0.866082592	low	600	0	74	MALE	Stage IB	T2	MX	N0
TCGA-78-7535	2.746056346	5.205907303	7.22926904	0.240765152	4.105438671	1.308169674	high	949	1	45	MALE	Stage IB	T2	M0	N0
TCGA-99-8028	1.69558629	1.6452702	5.79838354	0.46362146	8.40723596	0.917288741	low	1118	0	50	FEMALE	Stage IA	T1a	M0	N0
TCGA-4B-A93V	12.79598	3.148194	4.209843	0.4445548	3.047885	0.369568787	low	254	0	52	FEMALE	Stage IA	T1b	M0	N0
TCGA-55-7911	1.51848079	4.648029687	44.68414227	1.097236499	3.730003354	0.724898555	low	537	0	70	FEMALE	Stage IA	T1a	MX	N0
TCGA-78-7147	2.91063886	3.20010503	14.37019487	1.37852021	17.26832411	0.491378688	low	586	1	67	FEMALE	Stage IIB	T2	M0	N1
TCGA-55-A4DG	6.9937193	0.90390274	23.44961581	2.90646977	12.60569829	0.310030306	low	608	0	71	MALE	Stage IA	T1b	MX	N0
TCGA-97-A4M0	7.475886896	0.805751566	13.44259765	3.214609097	2.864351404	0.651123118	low	652	0	60	FEMALE	Stage IB	T2a	M0	N0
TCGA-05-4390	7.965518667	6.558528601	5.564809759	0.287687366	1.200840913	0.943359497	low	1126	0	58	FEMALE	Stage IB	T2	M0	N0
TCGA-38-4627	1.9019792	1.29795562	7.54813502	1.17216244	10.24279798	0.810429588	low	1147	1	64	FEMALE	Stage IIA	T1b	M0	N1
TCGA-50-5933	0.415853007	5.224999401	4.109912842	0.564603398	3.316585489	2.023573708	high	2393	1	72	MALE	Stage IIIB	T4	M0	N2
TCGA-44-7659	1.531128508	0.800113122	16.14491698	0.335610728	3.66838785	0.906695045	low	444	0	70	MALE	Stage IA	T1b	MX	N0
TCGA-73-4670	0.53834397	4.86407314	1.95784139	2.58249366	5.75893971	2.171599424	high	131	0	69	FEMALE	Stage IV	T2	M1	N0
TCGA-44-7662	3.62558696	8.612819408	14.45147314	1.022537006	5.168306349	1.352954976	high	218	0	61	MALE	Stage IB	T2a	MX	N0
TCGA-62-A46O	0.21797088	2.96293858	1.45837342	0.93531319	3.07601691	1.923584245	high	1454	1	65	FEMALE	Stage IB	T2	M0	N0
TCGA-05-4424	0.87770331	1.96593233	20.67593243	2.42581542	19.14637988	0.498957691	low	913	0	70	MALE	Stage IIB	T3	M0	N0
TCGA-86-8074	1.05067698	6.16184168	4.58912095	0.40833658	9.98670624	1.338393904	high	24	0	62	FEMALE	Stage IIA	T1b	M0	N1
TCGA-49-4505	15.19757145	0.63175901	11.49166597	0.45320513	6.17887297	0.159662165	low	428	1	61	FEMALE	Stage IIB	T2	M0	N1
TCGA-97-7554	0.426769444	2.138944152	15.4636386	0.171681374	5.806800415	1.022534984	high	775	0	83	FEMALE	Stage IIIA	T2a	M0	N2
TCGA-86-7714	1.56268312	1.06340851	18.80918423	0.25103339	13.1540801	0.499679712	low	625	1	61	FEMALE	Stage IIIA	T1b	M0	N2
TCGA-55-8506	9.76902745	7.05013127	32.61581926	0.12594148	1.18344768	0.431636757	low	11	0	62	FEMALE	Stage IIB	T3	MX	N0
TCGA-55-6980	1.8052052	1.05103838	4.54833395	0.92536109	8.48644944	0.924916755	low	2109	0	56	MALE	Stage IA	T1	M0	N0
TCGA-55-7284	0.26766092	1.2314421	8.92874393	0.24813103	7.83665666	0.999568646	high	243	1	74	MALE	Stage IIB	T3	MX	N0
TCGA-NJ-A4YQ	0.52701306	2.69812749	8.30411281	0.44645726	7.51875274	1.149892618	high	886	0	69	FEMALE	Stage IA	T1b	M0	N0
TCGA-38-4629	1.18121597	2.55198917	9.91960337	0.09972937	3.55304983	1.227180105	high	864	1	68	MALE	Stage IIB	T3	M0	N0
TCGA-05-4382	1.16526127	2.00473688	9.22842009	0.54179077	9.37549514	0.893115562	low	607	0	68	MALE	Stage IB	T2	M0	N0
TCGA-44-A4SS	0.90607607	2.15592231	4.40944857	0.66741885	9.4936834	1.042355109	high	415	0	73	MALE	Stage IA	T1b	M0	N0
TCGA-78-7161	24.11932401	1.64450155	11.06326	16.60513073	3.54243112	0.362181925	low	215	0	69	FEMALE	Stage IIB	T3	M0	N0
TCGA-55-6968	0.56961011	9.98526437	4.4880948	0.25627892	3.86552802	2.725620817	high	1293	1	61	MALE	Stage IV	T1	M1	N0
TCGA-38-4625	0.46685367	7.40680006	7.47477073	0.08675844	5.11544539	1.916978698	high	2973	0	66	FEMALE	Stage IB	T2a	M0	N0
TCGA-86-8673	1.864970018	6.066806088	10.54945716	0.170675627	2.398825331	1.596047433	high	455	0	61	MALE	Stage IB	T2	M0	N0
TCGA-95-8494	0.79597344	8.54846109	8.53537607	0.09326851	1.7265217	2.40266622	high	84	0	67	MALE	Stage IIA	T2a	M0	N1
TCGA-53-7626	10.20491457	3.31422783	20.80796111	1.32964826	12.49040536	0.229507345	low	929	1	76	FEMALE	Stage IIA	T1	M0	N1
TCGA-49-4514	0.74022125	3.6335118	6.03743523	0.10753065	3.47067214	1.547799509	high	1700	0	79	FEMALE	Stage IA	T1	M0	N0
TCGA-86-7713	0.589094332	4.397587886	12.82958449	10.2861614	8.515220673	3.121902487	high	422	0	70	MALE	Stage IIA	T2b	M0	N0
TCGA-55-6975	0.164042371	4.808638639	2.960262713	0.483935329	4.501758985	1.915622472	high	118	1	61	MALE	Stage IIB	T2	M0	N1
TCGA-49-6761	0.458572522	4.685728794	5.755677226	0.148092558	2.586100909	1.856920126	high	354	0	68	FEMALE	Stage IIIA	T1	MX	N2
TCGA-97-8171	0.204152378	0.625813342	12.79123911	0.132967018	2.921764589	1.157517751	high	568	0	81	MALE	Stage IV	T2a	M1a	N2
TCGA-86-A456	1.72937135	1.63532159	11.10227055	0.05286562	4.99143684	0.950003009	low	405	0	78	FEMALE	Stage IA	T1a	M0	N0
TCGA-55-8505	1.26531632	3.33251018	7.11593792	1.88015055	3.86193859	1.625339246	high	440	0	62	MALE	Stage IIIA	T1a	MX	N2
TCGA-99-7458	0.98605287	1.40273998	22.80549866	0.60682063	9.55130793	0.646575838	low	392	0	74	FEMALE	Stage IIIA	T4	M0	N0
TCGA-55-8204	0.74142636	4.05110278	7.99842344	0.75800719	15.42223088	0.824198063	low	515	0	87	FEMALE	Stage IB	T2a	MX	N0
TCGA-44-3396	1.311793421	5.265784561	25.23703323	0.480269392	20.51235491	0.423668813	low	411	0	74	FEMALE	Stage IIIA	T2	M0	N2
TCGA-86-A4JF	1.81725471	10.4209779	18.22916458	1.0356508	3.48533425	1.995067929	high	536	0	56	MALE	Stage IIB	T3	M0	N0
TCGA-50-5072	0.9288605	6.73655801	4.85364732	0.33764344	4.60625158	1.917098333	high	250	1	74	MALE	Stage IIIA	T2	M0	N2
TCGA-86-8674	1.56274525	0.94371455	4.99321474	19.48472648	6.48827816	7.227308757	high	405	0	50	MALE	Stage IIA	T2a	M0	N1
TCGA-35-4123	3.78386236	1.52003352	4.05042049	0.09029335	1.30001484	1.05546067	high	182	0	38	MALE	Stage IA	T1	M0	N0
TCGA-73-7499	1.7889308	2.79269077	15.19249967	0.19823787	8.34244785	0.794121138	low	715	0	81	FEMALE	Stage IB	T2a	M0	N0
TCGA-44-A4SU	2.9212977	1.6929999	10.1653973	2.8893476	9.0114519	0.894997324	low	409	1	67	FEMALE	Stage IA	T1a	MX	N0
TCGA-55-8614	1.64944864	2.68674013	15.36470254	2.15204203	15.3523416	0.652498755	low	536	0	76	MALE	Stage IB	T2a	MX	N0
TCGA-64-1677	2.35301137	3.13313847	15.38655015	0.46536214	9.07624893	0.74732695	low	628	1	77	FEMALE	Stage IIIA	T2	M0	N2
TCGA-38-4626	0.346576665	1.01567914	9.91931348	0.264223402	13.93798755	0.670675547	low	2595	0	57	FEMALE	unknow	T2b	M0	N0
TCGA-91-6828	0.87321766	2.37031617	24.58940683	0.35876766	7.64101657	0.742950108	low	323	0	70	MALE	Stage IA	T1a	M0	N0
TCGA-MP-A4TE	0.6475559	5.225312	9.299735	0.2123978	0.5387968	1.989730967	high	896	1	56	MALE	Stage IIA	T2b	MX	N0
TCGA-78-7633	0.2841961	0.8083126	4.533422	4.160946	6.859446	1.6833266	high	994	0	67	MALE	Stage IB	T2	M0	N0
TCGA-55-8511	0.78095976	4.41035528	9.47209853	0.13464237	8.36443185	1.152231086	high	552	0	73	FEMALE	Stage IB	T2a	MX	N0
TCGA-73-4659	5.889465	5.069338	6.662221	2.393689	5.536771	1.022265086	high	711	1	66	MALE	Stage IIIA	T2	M0	N2
TCGA-35-4122	0.45575133	1.20944667	3.0755669	0.74062199	5.6983448	1.316811108	high	225	0	69	MALE	Stage IA	T1	M0	N0
TCGA-78-7149	1.1357303	0.6352636	4.5732204	0.6743453	7.4964113	1.001306957	high	1093	0	71	MALE	Stage IIIB	T4	M0	N0
TCGA-78-8655	10.08954873	2.54630914	8.21231877	0.96624476	5.04535137	0.424419568	low	2360	0	77	FEMALE	Stage IA	T1	M0	N0
TCGA-55-8301	0.94435891	2.55798217	8.78608324	3.19049336	5.35121837	1.610354126	high	534	0	58	MALE	Stage IB	T2a	MX	N0
TCGA-55-8094	0.13884377	2.13716858	3.261236788	0.329695254	0.845390872	1.865301298	high	541	0	51	MALE	Stage IV	T2b	M1b	N0
TCGA-78-7148	0.26987668	3.7683319	14.19534222	0.33776197	4.50736235	1.342201587	high	626	1	71	MALE	Stage IIB	T2	M0	N1
TCGA-62-A46V	0.708746348	1.837921269	21.07145619	2.72244063	3.331817955	1.283820024	high	2199	0	78	FEMALE	Stage IB	T2	M0	N0
TCGA-49-6745	0.39120434	6.25673045	22.67494026	0.06462225	6.57490169	1.164231529	high	522	0	82	MALE	Stage IIIA	T2a	M0	N2
TCGA-55-7815	1.12595108	0.484247534	45.38166781	0.048428518	10.68299429	0.320354511	low	773	0	76	MALE	Stage IB	T2a	MX	N0
TCGA-55-6543	3.9109503	0.67599049	9.96098925	0.0858624	9.39428695	0.535005151	low	435	0	60	FEMALE	Stage IA	T1b	MX	N0
TCGA-38-6178	3.59123563	3.12106969	20.05622817	1.28677632	16.01683473	0.422699827	low	448	0	70	FEMALE	Stage IIIA	T2b	unknow	N2
TCGA-44-3398	0.90801275	0.44016945	5.47007104	0.29179215	7.99902712	0.928168418	low	253	0	77	FEMALE	Stage IA	T1b	M0	N0
TCGA-J2-A4AE	0.5854111	3.14593351	9.81827023	2.03076043	12.22735294	1.029845499	high	671	0	77	FEMALE	Stage IA	T1a	MX	N0
TCGA-69-7974	0.34975935	7.78134387	12.09233784	0.20502241	5.0733248	1.842293757	high	184	0	54	FEMALE	Stage IIIA	T2a	MX	N2
TCGA-99-8032	4.35112979	3.28488586	7.66555171	0.52253373	2.30304309	1.037749305	high	44	0	61	MALE	Stage IA	T1a	M0	N0
TCGA-93-7347	0.993526493	1.425590033	10.50227566	0.491517854	4.939165467	1.087798977	high	297	0	76	FEMALE	Stage IA	T1a	MX	N0
TCGA-50-5939	4.04961685	2.64203445	2.67020143	1.94298996	4.6968225	1.149214937	high	460	1	85	MALE	Stage IB	T2	M0	N0
TCGA-50-5941	0.88671143	4.0332296	9.87616671	0.08284189	10.72890075	0.94868837	low	567	0	55	FEMALE	Stage IIIA	T2a	M0	N2
TCGA-78-7163	1.2541121	0.56283544	13.69834522	0.22095341	9.7044115	0.676754867	low	6812	0	60	MALE	Stage IB	T2	M0	N0
TCGA-MP-A4SY	0.99079679	2.42748947	13.29405675	0.45172291	2.5304999	1.272454627	high	1501	1	61	MALE	Stage IIB	T2	M0	N1
TCGA-44-7669	0.22521444	9.40860581	4.42063156	0.3722132	8.79088345	2.070064035	high	574	1	59	MALE	Stage IIA	T1b	MX	N1
TCGA-55-6986	0.27955889	2.98473267	8.37165011	0.2743848	7.82818923	1.169403662	high	3261	0	74	FEMALE	Stage IB	T2	M0	N0
TCGA-55-6971	3.96687907	2.93679937	7.95333869	1.29183918	6.76276806	0.880422525	low	1400	0	59	FEMALE	Stage IB	T2	MX	N0
TCGA-50-6597	1.12222851	0.96032702	19.16425023	0.81491862	4.05949768	0.930431276	low	1268	1	79	FEMALE	Stage IB	T2	M0	N0
TCGA-49-4488	0.42550737	1.31157363	19.14585516	0.08558683	2.21022966	1.076851432	high	869	1	74	FEMALE	Stage IA	T1	MX	N0
TCGA-55-8203	9.98710487	3.69078179	7.43809892	2.32627084	2.66839085	0.633982535	low	547	0	69	FEMALE	Stage IA	T1b	M0	N0
TCGA-93-A4JP	1.2647244	4.23391328	7.79409368	5.24001112	26.35274108	0.667998	low	578	0	64	MALE	Stage IV	TX	M1b	NX
TCGA-62-A46Y	3.81518894	2.34200737	12.97681065	0.78465412	6.09827038	0.755919902	low	414	1	70	FEMALE	Stage IIIA	T2	M0	N2
TCGA-L4-A4E6	0.40469537	0.55775197	2.75523519	0.51813958	9.82104476	0.974588562	low	435	0	67	MALE	Stage IA	T1	M0	N0
TCGA-MP-A4TK	1.86698521	3.43120679	4.78540484	1.35868383	10.22118668	1.049717709	high	582	1	56	FEMALE	Stage IIB	T2	MX	N1
TCGA-44-7660	2.22705017	4.82962219	4.34242569	4.86778699	9.08953786	1.746698891	high	325	0	72	MALE	Stage IB	T2	MX	N0
TCGA-44-7667	0.7322268	26.38024	3.136339	0.08209082	0.9192691	12.21144818	high	557	0	49	FEMALE	Stage IIB	T3	MX	N0
TCGA-MP-A4TC	2.65806058	4.87357224	11.10750423	0.58600574	5.13459246	1.156379938	high	74	1	77	MALE	Stage IIIA	T1	M0	N2
TCGA-38-4630	4.72370563	6.808959349	13.91295738	0.915172338	15.80633481	0.552056458	low	1073	1	75	FEMALE	Stage IB	T2	M0	N0
TCGA-05-4396	0.22637182	1.1565422	11.98549869	0.31756054	3.58558829	1.203370729	high	303	1	76	MALE	Stage IIIB	T4	M0	N1
TCGA-MP-A4T7	0.75081198	1.83432857	7.40586806	2.14215863	3.90524805	1.561287916	high	167	1	75	FEMALE	Stage IV	T2	M1	N0
TCGA-44-6777	1.31978076	1.2584311	11.37162785	0.19111782	4.61567686	0.998845688	high	987	1	85	FEMALE	Stage IB	T2	MX	NX
TCGA-78-7155	1.86893724	10.03903983	0.94727172	1.34415414	1.492815	3.230436701	high	1171	1	68	MALE	Stage IB	T2	M0	N0
TCGA-62-8398	0.93890694	5.97401604	4.16401953	2.30496728	2.75555549	2.492804272	high	444	1	55	MALE	Stage IIIA	T2	M0	N2
TCGA-78-7540	0.18118146	1.45046897	7.6965094	0.3327107	7.00316997	1.118051045	high	881	0	66	FEMALE	Stage IB	T2	M0	N0
TCGA-62-8402	0.226791266	5.535178492	28.73988112	0.245239814	8.256907877	0.908909536	low	1498	1	73	FEMALE	Stage IIIA	T2	M0	N2
TCGA-86-6562	4.393416378	3.166333903	18.35321094	0.520077474	14.63453363	0.398569867	low	376	1	52	MALE	Stage IIA	T2a	M0	N1
TCGA-J2-8192	2.184835588	1.420537409	17.15711379	0.550257783	10.96952694	0.577609174	low	739	0	65	FEMALE	Stage IIA	T2a	MX	N1
TCGA-91-8499	0.60597897	4.6865863	5.23197839	0.84418039	4.25603021	1.800483228	high	36	0	76	FEMALE	Stage IA	T1b	MX	N0
TCGA-50-6673	0.4830606	2.071028	15.2144446	1.4372573	4.127849	1.275761122	high	22	1	84	FEMALE	Stage I	T1	M0	N0
TCGA-55-A48X	2.19756134	2.23943232	19.63186864	1.49881354	6.42476662	0.838505411	low	689	0	63	FEMALE	Stage IIA	T1b	M0	N1
TCGA-49-4486	0.37058993	0.24386722	1.98293993	0.36673255	5.09825821	1.253837664	high	2318	1	72	MALE	Stage IA	T1	M0	N0
TCGA-69-7760	4.73398278	3.74410705	24.03757396	2.88267683	2.1468309	0.931098328	low	202	0	73	MALE	Stage IIB	T3	M0	N0
TCGA-05-4249	1.12690444	1.78039408	49.30739413	0.94507466	2.37973203	0.579828233	low	1523	0	67	MALE	Stage IB	T2	M0	N0
TCGA-49-AAR0	3.66099152	2.80292654	2.67204424	0.59525354	5.89901743	0.99086432	high	4655	0	57	MALE	Stage IA	T1	MX	N0
TCGA-MP-A4T8	6.77388195	4.13986104	9.81526317	18.04293242	3.86595671	4.444497702	high	161	1	68	MALE	Stage IIIA	T2	M0	N2
TCGA-49-AARR	2.84561921	0.58512128	13.35500908	1.79962379	8.65556866	0.702208614	low	4992	0	68	MALE	Stage IA	T1	MX	N0
TCGA-50-6591	2.39106123	8.5689201	11.98814581	0.35547712	1.61394474	1.896940453	high	119	1	63	FEMALE	Stage IV	T2	M1	N0
TCGA-55-6972	0.30647023	0.58975877	1.52026136	1.30089302	8.45650759	1.192104832	high	1632	1	72	MALE	Stage IB	T2	M0	N0
TCGA-91-6848	0.86376063	20.66063472	2.51350851	0.42489458	4.73200094	6.34805387	high	224	0	59	MALE	Stage IIIA	T2	MX	N2
TCGA-44-8119	6.880848498	5.747225747	8.249958266	1.644147163	3.966912286	0.935349725	low	285	0	73	MALE	Stage IIB	T3	M0	N0
TCGA-97-8175	3.021985856	3.306039698	13.78057797	0.161791253	6.138806881	0.829135355	low	551	0	55	FEMALE	Stage IB	T2a	M0	N0
TCGA-78-7539	0.134639701	0.873756001	34.67612664	3.765719834	4.141118945	1.010686858	high	327	0	75	FEMALE	Stage IIA	T2b	M0	N0
TCGA-L9-A50W	10.18792266	1.254595192	11.1293078	1.995840754	3.597398192	0.428692718	low	442	1	75	MALE	Stage IIA	T1b	MX	N1
TCGA-86-8672	1.137253	4.93246	9.160619	0.904569	1.36183	1.879424275	high	19	1	59	MALE	Stage IIB	T3	M0	N0
TCGA-86-7955	0.239437072	4.940222028	7.547693763	0.385284243	7.927322574	1.411578789	high	508	0	62	MALE	Stage IB	T2a	M0	N0
TCGA-50-5051	1.47795068	3.12575176	6.94204407	1.92769678	2.7742457	1.671907501	high	478	1	42	FEMALE	Stage IIIA	T2	M0	N2
TCGA-NJ-A7XG	0.918830601	0.951478023	15.80935764	3.52418175	2.488374483	1.487171945	high	617	0	49	MALE	Stage IIIA	T4	M0	N1
TCGA-05-4418	0.511282923	1.431180581	1.460731404	0.804583086	3.126735777	1.610038294	high	274	1	69	MALE	Stage IIIA	T3	M0	N2
TCGA-05-4402	1.8031854	2.3983742	13.0747297	1.0454529	13.4271554	0.654354149	low	244	1	57	FEMALE	Stage IV	T2	M1	NX
TCGA-S2-AA1A	0.97135183	0.92544025	9.80477505	0.36066054	9.7125457	0.796221238	low	513	0	68	FEMALE	Stage IA	T1b	M0	N0
TCGA-62-8395	1.35960275	1.55596269	8.83676236	3.620032	6.82949665	1.351929079	high	1216	0	80	FEMALE	Stage IIB	T3	M0	N0
TCGA-55-7726	1.33104269	5.50557323	3.99220257	0.08607765	13.87594147	0.959064375	low	652	0	72	FEMALE	Stage IA	T1b	MX	N0
TCGA-97-8177	1.59074279	0.74799177	18.92679645	2.91780878	7.02493841	0.909561616	low	499	0	59	FEMALE	Stage IB	T2a	M0	N0
TCGA-44-2656	0.233099127	2.286055477	73.95496569	1.055532172	15.00943146	0.193680521	low	582	0	59	MALE	Stage IB	T2	M0	N0
TCGA-50-8457	6.64206108	0.73342142	19.43962989	0.9263123	7.94246142	0.370885063	low	779	0	63	FEMALE	Stage IA	T1a	M0	N0
TCGA-91-6836	0.22896932	9.29422806	37.69136917	0.0994204	1.41438252	1.488563737	high	417	0	52	FEMALE	Stage IB	T2	MX	N0
TCGA-78-8648	1.92138689	2.57736115	5.73832822	0.40722976	8.28908721	0.964732568	low	1209	1	58	FEMALE	Stage IIB	T3	M0	N0
TCGA-86-8585	0.989529288	3.990588092	1.873369811	1.700469738	8.262059895	1.512953269	high	353	0	57	MALE	Stage IB	T2a	M0	N0
TCGA-97-A4M3	0.53025463	0.515820831	10.00479518	1.418204887	2.982622567	1.332541622	high	540	0	69	FEMALE	Stage IA	T1b	M0	N0
TCGA-97-7553	1.397284028	3.489072617	6.507502267	0.325024539	17.407368	0.639056573	low	1870	0	58	FEMALE	Stage IA	T1	MX	N0
TCGA-55-A490	2.657562504	4.713874182	12.05199773	0.255015113	0.874196735	1.381722518	high	99	1	78	MALE	Stage IIA	T2b	MX	N0
TCGA-73-4658	0.37298912	2.41493914	33.69569763	0.08646751	5.29589945	0.725495817	low	1600	1	80	FEMALE	Stage IB	T2	M0	N0
TCGA-86-6851	3.72899902	2.43711466	6.94815033	1.24064989	11.04162712	0.69127069	low	179	0	73	FEMALE	Stage IIA	T1b	M0	N1
TCGA-78-7162	0.197977666	0.939894061	5.10071414	0.93872215	11.73007454	0.917655516	low	3169	1	75	MALE	Stage IA	T1	M0	N0
TCGA-05-4432	5.17058565	3.09943678	11.8242048	1.00674517	4.14395541	0.798534303	low	761	0	66	MALE	Stage IIB	T2	M0	N1
TCGA-78-7537	0.569185168	0.76496946	12.9967188	0.384447755	5.44455096	0.988719504	high	1622	1	72	MALE	Stage IB	T2	M0	N0
TCGA-J2-A4AD	2.5096837	1.8430374	11.8885155	2.2184768	29.3033353	0.265738517	low	550	1	61	FEMALE	Stage IA	T1a	MX	N0
TCGA-44-7661	0.52861273	7.6810748	10.1163098	0.24502124	6.99764353	1.676044612	high	366	0	69	FEMALE	Stage IB	T2a	M0	N0
TCGA-93-7348	0.99008934	1.40078879	34.23474962	0.97803414	10.84218039	0.487255481	low	127	0	75	FEMALE	Stage IA	T1a	MX	N0
TCGA-L9-A444	3.09266441	1.48889701	8.16428611	4.89976366	4.98456825	1.398771804	high	307	0	60	FEMALE	Stage IA	T1a	MX	N0
TCGA-49-AAR9	0.170645431	4.23520281	2.90834082	1.220052745	5.891678528	1.82183823	high	260	1	61	MALE	Stage IIB	T3	MX	N0
TCGA-49-AARO	6.7816735	3.06563769	7.64574264	1.16130895	3.65642479	0.74617826	low	3759	0	39	FEMALE	Stage IA	T1a	MX	N0
TCGA-55-A492	0.21324018	0.16760802	5.1500452	1.45830318	4.34444855	1.388357796	high	596	0	70	FEMALE	Stage IA	T1a	MX	N0
TCGA-55-8299	1.27321214	2.84600524	4.05457224	2.1093701	9.16538235	1.257186024	high	469	1	61	FEMALE	Stage IA	T1b	MX	N0
TCGA-50-5932	0.11070351	1.56261935	62.70612038	0.9042867	3.25851243	0.458023232	low	1235	1	75	MALE	Stage IIB	T2	M0	N1
TCGA-78-7220	2.1646794	7.2107047	6.9171446	0.90571597	3.24613433	1.876999672	high	807	1	53	FEMALE	Stage IIIA	T2	M0	N2
TCGA-86-8279	7.71602977	4.88616439	19.27751109	11.61880388	12.1659033	1.089347485	high	482	0	46	MALE	Stage IIA	T2a	M0	N1
TCGA-62-A471	0.76438192	6.25624653	5.62332893	2.0392073	2.04302702	2.560167763	high	1246	0	64	MALE	Stage IIB	T2b	M0	N1
TCGA-55-6978	0.76417114	9.82191305	17.07736419	0.43324354	5.77668164	1.825889881	high	176	1	81	MALE	Stage IIA	T2b	MX	N0
TCGA-49-4506	0.401083255	1.016087174	0.470569444	0.260225849	3.440455495	1.495799465	high	999	1	68	FEMALE	Stage IIB	T2	M0	N1
TCGA-53-7813	1.31326428	2.46084438	15.54614478	1.29328253	1.9375589	1.319047702	high	424	0	51	FEMALE	Stage IIIB	T4	M0	N0
TCGA-55-7576	2.06756603	4.23509111	24.32844106	0.11283338	5.0438068	0.849835596	low	670	0	54	MALE	Stage IB	T2a	M0	N0
TCGA-05-5428	10.51116072	1.01767484	9.58038083	0.27069847	4.96907384	0.322581674	low	670	0	57	MALE	Stage IIA	T1b	M0	N1
TCGA-97-A4M7	0.9158405	2.66640529	16.66301134	0.8681183	7.24081215	0.969146011	low	629	0	74	MALE	Stage IA	T1b	M0	N0
TCGA-55-7227	0.876123615	2.302313022	17.31545128	0.231020127	5.518043709	0.963622929	low	952	1	77	MALE	Stage IIIA	T3	MX	N1
TCGA-MP-A4T4	2.65523989	2.80809086	11.57431588	1.29240449	2.72502231	1.19642972	high	2617	1	68	FEMALE	Stage IIB	T2	M0	N1
TCGA-78-7166	0.99044772	2.35018169	4.88920984	0.75402628	2.50011647	1.566772514	high	258	1	84	MALE	Stage IIB	T2	M0	N1
TCGA-55-7903	0.750718671	4.101396848	18.75670672	0.265136235	1.900410833	1.358724185	high	567	0	64	MALE	Stage IA	T1b	MX	N0
TCGA-93-8067	0.23433992	9.42924124	11.44925937	0.28422174	3.53102098	2.389113614	high	186	0	77	MALE	Stage IB	T2a	MX	N0
TCGA-95-7948	30.90227604	1.4406649	5.64077753	36.46356201	8.57590051	1.019335511	high	133	0	42	FEMALE	Stage IB	T2a	M0	N0
TCGA-55-1594	0.1340075	4.664645	15.05973	0.2563873	4.521664	1.428174533	high	1178	0	68	MALE	Stage IIIA	T2	M0	N2
TCGA-64-1679	3.72535792	4.35136044	7.81125344	0.2788934	19.51541083	0.440490994	low	1686	0	58	FEMALE	Stage IIIA	T1	M0	N2
TCGA-44-2659	1.812290466	1.019044548	8.958091324	0.266150202	8.79958545	0.768608369	low	529	0	65	FEMALE	Stage IIB	T1	M0	N1
TCGA-55-A4DF	5.072656105	5.578494698	7.74597937	1.122125378	7.210871582	0.916262082	low	440	1	88	MALE	Stage IA	T1b	MX	N0
TCGA-64-5815	1.40825181	2.067474676	14.48341592	0.083023515	3.50381871	1.040600392	high	224	0	74	MALE	Stage IIB	T2	M0	N1
TCGA-49-4512	1.91031326	1.11727079	12.90493855	0.55720085	4.19633236	0.945021961	low	905	1	69	FEMALE	Stage IIIA	T2	MX	N2
TCGA-86-A4P7	0.868614064	2.863085273	18.90841886	0.415179643	8.403707464	0.841979575	low	415	0	63	FEMALE	Stage IB	T2a	M0	N0
TCGA-86-7953	0.78852876	4.72552133	20.27084263	0.16034265	5.78876363	1.088707383	high	591	0	69	FEMALE	Stage IA	T1b	M0	N0
TCGA-86-7954	5.04815741	3.73343837	22.72143722	5.51991822	5.27320541	1.011052039	high	605	0	68	FEMALE	Stage IB	T2	M0	N0
TCGA-86-7701	3.25697031	3.22157009	11.38513328	0.16684428	3.34588067	0.989989697	high	474	0	66	MALE	Stage IV	T2	M1	N0
TCGA-64-5781	0.60660928	2.7388189	1.37534924	0.06431735	1.80794509	1.772204175	high	1202	0	55	FEMALE	Stage IB	T2	M0	N0
TCGA-MN-A4N1	1.078887578	5.158739224	25.0390601	1.472419392	12.33582446	0.771321479	low	827	0	60	MALE	Stage IIA	T2a	M0	N1
TCGA-99-AA5R	1.91658084	0.96374971	3.53588887	0.61057823	21.29353923	0.427981297	low	658	0	70	FEMALE	Stage IA	T1a	M0	N0
TCGA-55-8512	2.09657752	0.52641958	19.62250988	1.89846237	8.51041665	0.682425066	low	607	1	41	MALE	Stage IV	T1a	M1b	N1
TCGA-55-8205	0.45121598	15.26546719	11.94463919	0.88792752	5.34328254	3.554431809	high	599	0	76	FEMALE	Stage IIA	T2b	M0	N0
TCGA-64-5778	4.377993936	1.074214798	11.22134813	0.27062303	5.041262871	0.665256582	low	926	0	60	MALE	Stage IB	T2	M0	N0
TCGA-35-3615	0.11203364	0.49166327	5.1996349	0.10996011	5.56420032	1.168272984	high	14	0	57	MALE	Stage IB	T2	M0	N0
TCGA-95-7567	4.769277235	7.752353774	23.03764588	3.552846882	3.387184374	1.311546844	high	163	0	61	MALE	Stage IIB	T2b	M0	N1
TCGA-50-5946	0.965228057	3.678992116	20.02912164	1.266008651	8.367123855	0.950336341	low	686	0	62	MALE	Stage IA	T1	MX	N0
TCGA-05-4427	3.831449753	3.752003456	34.4608915	0.100889526	2.356729196	0.61569363	low	791	0	65	FEMALE	Stage IIB	T2	M0	N1
TCGA-78-7143	0.45317445	6.8046055	26.53808015	1.08648764	12.10971514	0.898325857	low	4961	1	62	FEMALE	Stage IB	T2	M0	N0
TCGA-69-8254	0.55486556	1.28031508	13.50182572	0.40701207	6.73796123	0.950613335	low	409	0	85	MALE	unknow	T2b	unknow	unknow
TCGA-55-6979	2.32521208	7.64460396	11.15491221	0.37996701	13.53333098	0.910102977	low	237	1	59	FEMALE	Stage IIB	T2	M0	N1
TCGA-05-4417	1.21817739	1.85303354	9.69047941	0.3838725	3.21421037	1.217852813	high	455	0	51	FEMALE	Stage IB	T2	M0	N0
TCGA-49-AARE	0.75840551	2.54170092	6.17318001	1.36823632	10.8568658	1.048580167	high	1229	1	51	FEMALE	Stage IA	T1	MX	N0
TCGA-64-5774	4.25509274	7.92675817	9.76302504	0.65985609	1.36172365	1.570432396	high	2550	0	60	MALE	Stage IB	T2	M0	N0
TCGA-55-1592	6.9230982	2.46227179	16.0408335	4.51326085	14.16395028	0.450099807	low	701	1	65	MALE	Stage IA	T2	M0	N0
TCGA-49-AAR4	2.60133168	6.10460828	11.83518116	0.83496851	6.97463694	1.169854364	high	879	1	51	MALE	Stage IIIA	T2	MX	N2
TCGA-78-7160	0.28794763	2.09485462	23.59566932	0.34346707	11.69039032	0.630659706	low	678	0	61	MALE	Stage IV	T4	M1	N2
TCGA-69-A59K	16.10490053	2.80251385	34.72211362	1.8550384	3.88199053	0.136394186	low	591	0	60	FEMALE	Stage IIB	T3	M0	N0
TCGA-05-5429	0.27230231	2.24732762	9.03309246	0.05477107	2.31566069	1.459512953	high	275	1	60	MALE	Stage IIIA	T3	M0	N2
TCGA-44-2655	0.142786944	0.541732193	12.08720803	2.128244913	7.059628476	1.139801724	high	575	0	65	FEMALE	Stage IA	T1	M0	N0
TCGA-55-8092	2.00587804	1.78899449	3.01009476	10.94621534	3.95391845	3.645718577	high	154	1	75	MALE	Stage IIB	T3	MX	N0
TCGA-MP-A4T9	2.13494534	5.85583858	10.85306634	0.93851857	14.66453988	0.804587496	low	1265	1	54	FEMALE	Stage IIIA	T2	MX	N2
TCGA-86-8359	4.76883162	2.60896941	12.0612381	5.3636655	3.74301676	1.291157022	high	444	1	52	MALE	Stage IIIA	T3	M0	N2
TCGA-55-A493	1.58422224	5.31459874	7.3032127	0.25441019	1.6846865	1.751917696	high	28	0	54	FEMALE	Stage IB	T2a	M0	N0
TCGA-05-5420	0.33568267	0.79867665	1.96949463	0.38261012	6.56506415	1.213070351	high	457	0	67	MALE	Stage IIIA	T2	M0	N2
TCGA-78-7159	4.410741161	4.625496549	17.1086592	1.281353147	2.702734203	0.991454967	high	1221	0	60	FEMALE	Stage IA	T1	M0	NX
TCGA-44-2661	0.95068525	0.62084464	13.38474995	0.69004625	9.66894812	0.747807013	low	446	0	69	FEMALE	Stage IA	T1	M0	N0
TCGA-50-5935	2.34968322	0.49057344	19.39201457	3.25564074	3.20753895	1.036244773	high	653	1	86	FEMALE	Stage IA	T1	M0	N0
TCGA-44-2665	2.936404	2.46374488	6.88441015	10.35182059	5.08125817	2.78211409	high	400	0	55	FEMALE	Stage IIB	T2	M0	N1
TCGA-97-7937	7.148091707	1.557048783	24.37404652	5.552635364	12.29396821	0.421575706	low	564	0	65	MALE	Stage IB	T2a	MX	N0
TCGA-38-4628	3.00458437	1.39572779	9.8853759	0.2471742	8.98893809	0.661795996	low	1492	1	65	FEMALE	Stage IIB	T2	M0	N1
TCGA-73-4676	0.08198979	3.56746066	11.88353806	0.04672586	8.9928028	1.06393532	high	164	0	45	MALE	Stage IIA	T2a	M0	N1
TCGA-L9-A8F4	11.57300065	6.0935873	4.61233218	4.30462315	6.20259693	0.674983656	low	476	0	64	FEMALE	Stage IB	T2a	MX	N0
TCGA-44-A47G	1.04518559	2.46456591	14.82445587	0.63441984	8.74754281	0.8733625	low	351	0	73	FEMALE	Stage IA	T1	M0	N0
TCGA-97-7547	0.186747693	0.686133486	19.474892	0.301956346	7.086276222	0.807840912	low	1965	0	67	FEMALE	Stage IB	T2	MX	N0
TCGA-05-4422	0.41793614	1.25803427	2.3340776	21.29869171	4.64975785	12.1469394	high	365	0	68	MALE	Stage IB	T2	M0	N0
TCGA-97-A4M2	1.21716505	0.6980206	8.27767546	4.33463435	11.57712101	1.063468536	high	624	0	66	MALE	Stage IA	T1a	M0	N0
TCGA-J2-8194	3.93103451	1.43030921	18.91886863	7.56439975	9.92527878	0.987292352	high	724	0	69	FEMALE	Stage IIB	T3	MX	N0
TCGA-95-A4VN	0.76970669	6.00055224	18.30474571	0.84746898	4.6523158	1.448885314	high	553	0	62	FEMALE	Stage IIA	T2a	M0	N1
TCGA-49-6743	2.67955444	7.91029033	5.4893559	0.36933886	7.94234747	1.387098997	high	369	0	81	FEMALE	Stage IIIA	T1	MX	N2
TCGA-78-7542	0.93449528	11.45057834	4.94217996	0.29766399	4.89790988	2.751561993	high	321	1	56	MALE	Stage IB	T2	M0	N0
TCGA-55-8615	8.33286204	2.499097054	6.040778353	3.206339959	0.8589914	0.884773025	low	446	0	67	MALE	Stage IIIA	T3	MX	N2
TCGA-05-4389	0.3029162	2.83904369	10.07664809	0.21852088	5.2136929	1.283995549	high	1369	0	70	MALE	Stage IA	T1	M0	N0
TCGA-91-6829	0.71517554	5.62132147	16.23063197	0.76638503	12.51016632	0.931968956	low	1258	1	78	MALE	Stage IB	T2	MX	N0
TCGA-91-8496	0.29695432	0.16509334	26.08562221	0.09906371	8.07097687	0.612650986	low	505	0	63	FEMALE	Stage IB	T2a	MX	NX
TCGA-49-4487	0.576636	5.76579775	3.84206436	0.12929469	8.35478567	1.490359474	high	855	1	72	FEMALE	Stage IA	T1	M0	N0
TCGA-NJ-A4YG	0.79706379	1.18233605	20.42089758	0.25956885	4.0556468	0.906342784	low	1904	0	65	MALE	Stage IB	T2	M0	N0
TCGA-44-6774	1.45634736	1.9179369	10.03808593	0.27482458	4.37889922	1.090797232	high	361	0	56	FEMALE	Stage IIIA	T1	M0	N2
TCGA-50-6593	0.83107971	4.11821121	21.66909718	1.54033074	7.20603403	1.063607898	high	336	1	49	FEMALE	Stage IIIA	T1	M0	N2
TCGA-44-5643	0.174593029	5.088108372	6.223779772	0.428616725	3.14851375	1.96114944	high	417	0	53	MALE	Stage IIIA	T2b	M0	N2
TCGA-50-8460	1.664404283	1.932299488	7.961103964	1.032334986	5.689758412	1.116527756	high	829	0	74	MALE	Stage IA	T1a	M0	N0
TCGA-71-6725	3.335861222	1.998592269	37.52348896	0.079766535	11.06265066	0.320677267	low	256	0	48	FEMALE	Stage IB	T2	M0	N0
TCGA-L9-A743	4.46561615	4.76693103	24.57230145	0.94234376	5.77641627	0.685743323	low	664	0	56	MALE	Stage IIA	T2a	M0	N1
TCGA-55-6984	0.52962821	3.34924921	17.80274685	0.27439486	2.97239354	1.261323606	high	760	1	71	FEMALE	Stage IIB	T2	M0	N1
TCGA-05-4250	0.64901231	4.92730048	22.03902314	0.41904479	2.22509931	1.367639851	high	121	1	79	FEMALE	Stage IIIA	T3	M0	N1
TCGA-55-7913	0.558275911	6.592386332	12.32566538	1.060535411	1.768018502	2.144046981	high	561	1	61	FEMALE	Stage IA	T1b	MX	N0
TCGA-69-7980	0.2582276	5.1672379	19.4627033	0.3719968	6.6142867	1.195375516	high	411	0	70	FEMALE	Stage I	T1b	M0	N0
TCGA-95-7944	0.37548778	4.05736895	0.50453217	1.58222859	4.70072217	2.050626023	high	21	0	71	MALE	Stage IA	T1a	M0	N0
TCGA-NJ-A4YF	8.44536268	1.32449214	3.10171026	0.20416496	1.51900189	0.595103827	low	2161	0	50	FEMALE	Stage IA	T1	M0	N0
TCGA-67-3774	1.4843432	1.4621335	21.8152534	2.8536354	6.7306326	0.927496604	low	385	0	73	FEMALE	Stage IB	T2	M0	N0
TCGA-55-6985	5.16582558	5.2898286	17.22910316	0.63085638	9.91656227	0.586191705	low	1233	0	58	FEMALE	Stage IB	T2	MX	N0
TCGA-55-7725	0.0417727	0.49250381	11.41215177	0.60705814	9.2543607	0.877360882	low	442	0	68	FEMALE	Stage IA	T1a	MX	N0
TCGA-L4-A4E5	10.53599915	5.009810875	8.520313775	0.392370031	1.035282485	0.579235021	low	578	0	48	FEMALE	Stage I	T1	M0	N0
TCGA-62-8397	0.61904971	0.64186711	8.21255597	0.22518863	4.48760837	1.120985871	high	1289	0	70	FEMALE	Stage IIB	T3	M0	N0
TCGA-44-7672	1.0407748	4.6615617	17.4219372	0.1421566	4.8227427	1.177989132	high	418	0	52	FEMALE	Stage IA	T1b	M0	N0
TCGA-73-A9RS	0.42144124	7.82272057	10.97070631	0.72669466	4.97380216	1.993040659	high	340	1	41	MALE	Stage IIB	T3	M0	N0
TCGA-67-6216	0.22956712	3.26257003	16.56338312	3.24599748	5.1782141	1.600838663	high	141	0	57	FEMALE	Stage IA	T1a	M0	N0
TCGA-86-8076	5.46498127	1.1265824	13.71396222	1.01746206	6.14718314	0.561197698	low	489	0	42	MALE	Stage IA	T1	M0	N0
TCGA-44-6778	0.24539838	3.80946993	4.15024776	0.17481522	15.63495285	0.867924058	low	1110	0	59	MALE	Stage IA	T1	MX	N0
TCGA-69-7973	1.59968967	4.49201916	8.36186609	0.63798131	5.19415414	1.358278474	high	230	0	42	FEMALE	Stage IB	T2a	M0	N0
TCGA-MP-A4TF	1.62660741	3.09846113	2.91273903	0.62430692	2.84702964	1.553528059	high	336	1	58	FEMALE	Stage IIA	T2b	M0	N0
TCGA-05-4420	5.03997767	5.17459132	5.67114436	0.48297735	5.76080461	0.94700758	low	912	0	41	MALE	Stage IB	T2	M0	N0
TCGA-69-7763	0.3647187	1.2098489	12.62925106	1.52190416	6.65665469	1.112376365	high	690	0	69	MALE	Stage IA	T1b	M0	N0
TCGA-97-A4M5	0.63804005	1.52268001	8.03747546	2.88786541	10.58251807	1.119299418	high	634	0	83	MALE	Stage IA	T1b	M0	N0
TCGA-55-8302	0.785957258	5.700967789	16.99563219	0.613680037	5.904887998	1.317821231	high	478	0	54	MALE	Stage IB	T2	MX	N0
TCGA-64-1676	6.68600413	1.68003717	11.04325185	0.37137855	2.2457358	0.626217433	low	1728	0	58	MALE	Stage IA	T1a	M0	N0
TCGA-MP-A4SV	6.20953048	6.61071094	17.16407349	1.59973256	4.17940727	0.884889711	low	2620	1	67	MALE	Stage IB	T2	M0	N0
TCGA-99-8025	0.94680081	3.19529611	18.22518983	0.79224106	8.5995999	0.894109295	low	1060	0	72	FEMALE	Stage IIIA	T3	M0	N2
